# Supplementary material for: A structure–property relationship study of bent-core mesogens with pyridine as the central unit
Source: Royal Society of Chemistry journal article supplement (doi:10.1039/c3nj01430d), 2014-01-01
Supplement: c3nj01430d1.pdf [file c3nj01430d1.pdf]

## Structure–property relationship study of bent-core mesogens with pyridine as central unit

J.M. Marković,<sup>a</sup> N.P. Trišović,<sup>\*a</sup> T. Tóth-Katona,<sup>b</sup> M.K. Milčić,<sup>c</sup> A.D. Marinković,<sup>a</sup> C. Zhang,<sup>d</sup>  
A.J. Jáklí<sup>b,d</sup> and K. Fodor-Csorba<sup>b</sup>

<sup>a</sup>*Faculty of Technology and Metallurgy, University of Belgrade, Belgrade, Serbia*

<sup>b</sup>*Wigner Research Centre for Physics, Institute for Solid State Physics and Optics of the Hungarian Academy of  
Sciences H-1525 Budapest, P.O.Box 49, Hungary*

<sup>c</sup>*Faculty of Chemistry, University of Belgrade, Belgrade, Serbia*

<sup>d</sup>*Liquid Crystal Institute, Kent State University, Kent, Ohio 44242, USA*

New Journal of Chemistry

Electronic Supplementary Information

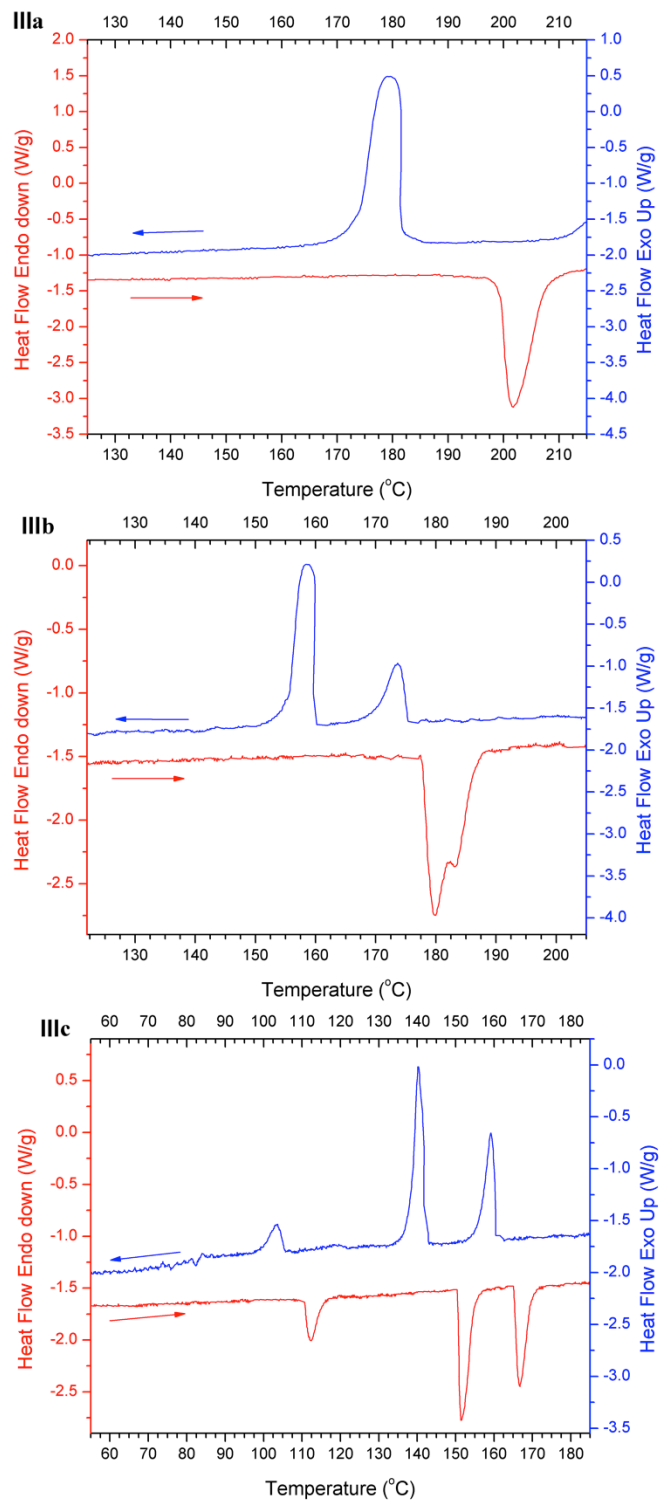

**Figure S1** DSC curves of compounds **IIIa–IIIc**

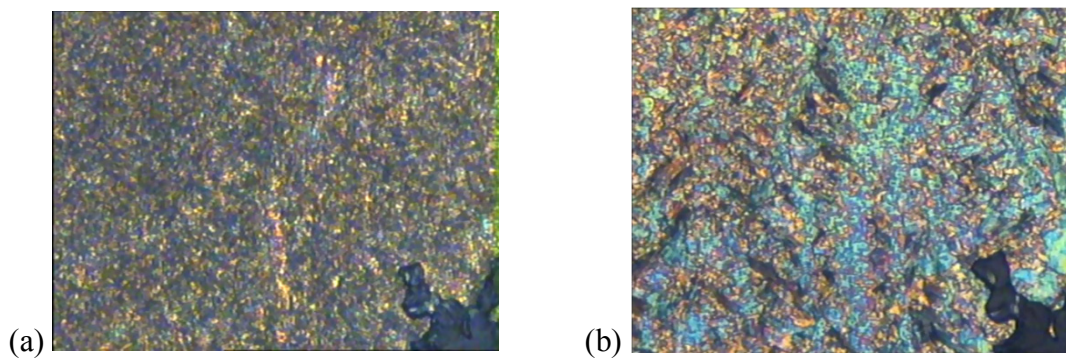

**Figure S2** Optical photomicrographs (crossed polarizers) of compound **IIc**: a)  $T=238^{\circ}\text{C}$ : mesophase formation on heating; b)  $T=241^{\circ}\text{C}$ : mesophase transition on heating;
